# Supplementary material
Source: publisher site journal article supplement (https://www.spandidos-publications.com/2466/downloadSupplementary)

Figure S1. Inhibition of cell growth by 10-HDA in HCT116 human colon carcinoma cell line. Cell viability was measured by MTT assays. Cells were treated with DMSO (<0.5%, control) or 0.62, 1.25, 2.5, 5.0 or 10 mM of 10-HDA for 48 h in DMEM containing 10% FBS. Results were expressed as a percentage of growth, with 100% representing control cells treated with DMSO alone. All experiments were performed in triplicate. 10-HDA, 10-hydroxy-2-decenoic acid.

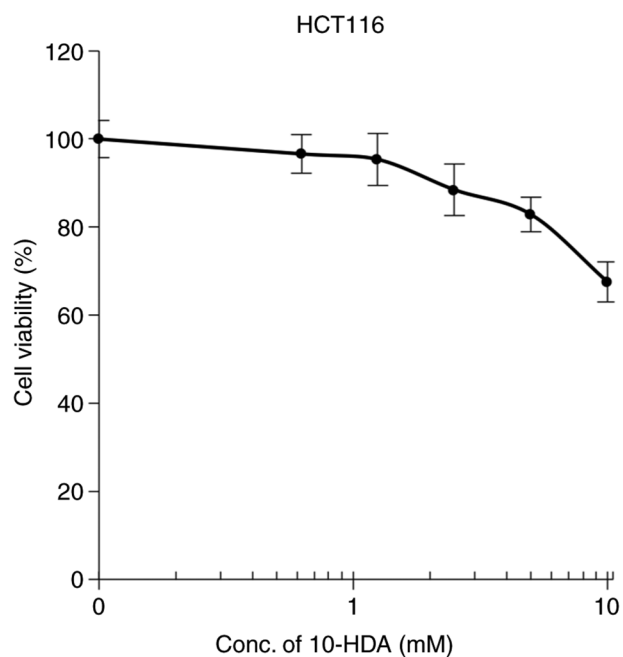

Supplement: Supplementary file 1 [file downloadSupplementary]
